# Supplementary material for: Rb-Sr and in situ 40Ar/39Ar dating of exhumation-related shearing and fluid-induced recrystallization in the Sesia zone (Western Alps, Italy)
Source: Oxford University Press journal article supplement (doi:10.1130/ges01521.1), 2018-07-05
Supplement: ges01521_suppfile.xls [file ges01521_suppfile.xls]

## Sheet: Ar-Ar sample 10-1
Supplement A: Results of in situ argon isotopic analyses of sample 10-1 measured by UV laser ablation
		40Ar/39Ar			37Ar/39Ar			36Ar/39Ar			K/Ca	40Ar*	40Ar*/39ArK			Age		1s		40Ar		39Ar/40Ar		38Ar		37Ar		36Ar
Analysis ID	Ar disc							(×10-3)				(%)				(Ma)		(Ma)		V	error in %		error in %	V	error in %	V	error in %	V	error in %
10-1 cores	J=0.002569
U1301201	10-1-Ar-4	16.1968	±	0.0687513	0.600274	±	1.26205	6.93534	±	0.898551	0.979531	87.6516	14.2028	±	0.294093	64.6529	±	1.33936		0.000774741	0.17	0.058282	0.34	7.66843e-07	3.1	3.59811e-07	12.8	6.84161e-07	4.8
U1301202	10-1-Ar-4	15.1401	±	0.118738	4.82004	±	1.13054	6.51614	±	0.677472	0.121626	89.8992	13.6572	±	0.247732	62.2114	±	1.13589		0.000650978	0.19	0.0616279	0.73	7.05734e-07	6.7	5.10172e-07	7.4	6.30878e-07	3.7
U1301203	10-1-Ar-4	16.2371	±	0.0737049	0.467158	±	0.500659	3.66782	±	0.362135	1.25877	93.5614	15.1967	±	0.13509	69.0917	±	0.660768		0.00115186	0.19	0.0592409	0.36	9.3488e-07	2.92	3.49745e-07	6.7	6.19776e-07	3.3
U1301207	10-1-Ar-4	14.5575	±	0.118876	0.334974	±	2.08918	2.60646	±	0.82853	1.75565	94.8984	13.8181	±	0.322084	62.932	±	1.46265		0.000488404	0.21	0.0618241	0.75	5.06313e-07	4.97	3.71308e-07	15.1	5.84501e-07	2.55
U1301208	10-1-Ar-4	15.1633	±	0.0697825	0.224535	±	1.44456	1.96385	±	0.586735	2.61938	96.2946	14.6038	±	0.222551	66.4449	±	1.02783		0.000732126	0.23	0.0615361	0.31	6.87584e-07	6.7	3.88321e-07	15	5.94395e-07	2.9
U1301209	10-1-Ar-4	15.2412	±	0.0567226	0.374467	±	1.08034	3.56735	±	0.526378	1.57044	93.2855	14.2216	±	0.188407	64.7368	±	0.879989		0.00099556	0.15	0.0623703	0.3	1.08586e-06	3.23	4.1665e-07	14.5	7.28528e-07	3.56
10-1 rims	J=0.002569
U1301204	10-1-Ar-4	13.407	±	0.0810395	1.16824	±	0.790407	2.59961	±	0.77454	0.50311	94.9866	12.7454	±	0.252234	58.1242	±	1.15485		0.000704324	0.15	0.0697651	0.56	7.9685e-07	6.89	3.84839e-07	7.7	5.75232e-07	5.6
U1301205	10-1-Ar-4	13.2201	±	0.0786027	2.2475	±	1.60706	2.65177	±	1.03475	0.261315	95.4703	12.6412	±	0.344718	57.6567	±	1.56396		0.000598076	0.19	0.0698924	0.52	6.89776e-07	4.4	4.21061e-07	14.7	5.58188e-07	6.86
U1301206	10-1-Ar-4	13.0339	±	0.0568797	2.11937	±	1.16063	2.82098	±	0.856209	0.277138	94.9411	12.393	±	0.278398	56.542	±	1.27014		0.000643799	0.14	0.071299	0.38	6.90401e-07	7.5	4.24247e-07	11	5.76988e-07	5.84
U1301210	10-1-Ar-4	13.4811	±	0.0635661	0.230484	±	0.677214	5.10684	±	0.676831	2.55176	88.9466	11.993	±	0.216896	54.7444	±	0.998763		0.000641342	0.11	0.0685062	0.44	7.08056e-07	4.42	2.901e-07	3.73	7.31338e-07	3.01
10-1 cores	J=0.002569
U1301101	10-1-Ar-6	15.526	±	0.114346	0.204595	±	0.974614	5.56454	±	0.774203	2.87471	89.5176	13.9005	±	0.265157	63.3007	±	1.21235		0.000780415	0.19	0.0606872	0.68	6.88899e-07	4.9	2.91907e-07	8	6.86315e-07	1.53
U1301102	10-1-Ar-6	15.0719	±	0.154402	0.179062	±	1.13125	4.29675	±	0.729704	3.28468	91.6735	13.8187	±	0.276096	62.9345	±	1.26027		0.000860568	0.26	0.062904	0.95	7.98881e-07	6.2	4.05011e-07	10	6.98899e-07	4.4
U1301103	10-1-Ar-6	17.7474	±	0.0571971	0.156525	±	0.99888	14.4412	±	0.585316	3.75768	76.0275	13.4944	±	0.198025	61.4826	±	0.919394		0.00114399	0.12	0.054149	0.27	1.05819e-06	6.16	4.00504e-07	10.36	1.36595e-06	1.93
U1301107	10-1-Ar-6	15.0718	±	0.116058	0.492445	±	1.85097	2.26292	±	0.77275	1.19411	95.8319	14.4486	±	0.298475	65.7517	±	1.3586		0.000586498	0.24	0.0610776	0.68	5.74194e-07	6.19	4.05677e-07	14.8	5.93477e-07	3.45
U1301108	10-1-Ar-6	15.0212	±	0.0766905	0.267856	±	2.35358	2.36028	±	0.96559	2.19567	95.5034	14.3485	±	0.355369	65.3042	±	1.60905		0.000593213	0.17	0.0613423	0.44	5.84597e-07	6.3	3.7185e-07	22	5.98342e-07	5
U1301110	10-1-Ar-6	15.2596	±	0.116224	3.61089	±	1.25089	1.441	±	1.04979	0.162492	99.1548	15.1691	±	0.350143	68.9687	±	1.58521		0.000581619	0.16	0.0609059	0.72	6.21092e-07	8.3	3.4458e-07	10.8	5.16304e-07	5.83
U1301114	10-1-Ar-6	15.0647	±	0.0879829	0.238725	±	1.11044	2.74205	±	1.21675	2.46366	94.7517	14.2765	±	0.383452	64.9824	±	1.73321		0.00066989	0.19	0.0619985	0.51	6.75789e-07	8.2	3.62132e-07	10.2	6.2667e-07	7.3
U1301115	10-1-Ar-6	15.2816	±	0.0845618	0.24763	±	1.05463	3.273	±	0.848585	2.37505	93.8042	14.3373	±	0.279654	65.2541	±	1.27608		0.000656372	0.31	0.0610324	0.31	6.35661e-07	4.49	3.57881e-07	8.9	6.44025e-07	4.03
10-1 rims	J=0.002569
U1301104	10-1-Ar-6	14.8117	±	0.121187	0.278989	±	1.85955	7.05421	±	0.948213	2.10804	86.0814	12.7527	±	0.338211	58.1569	±	1.53494		0.000559947	0.18	0.0622146	0.77	6.13068e-07	5.94	3.9558e-07	10.4	7.80779e-07	3.3
U1301105	10-1-Ar-6	13.5597	±	0.079362	0.201727	±	1.31864	2.26616	±	0.653261	2.91558	95.1838	12.9085	±	0.235651	58.856	±	1.08219		0.000697524	0.11	0.0690779	0.56	7.40732e-07	4.13	2.95632e-07	13.2	6.43335e-07	3.7
U1301106	10-1-Ar-6	13.4281	±	0.0760622	0.377937	±	1.71549	2.40992	±	0.986443	1.55602	94.9281	12.7505	±	0.334426	58.147	±	1.51815		0.000661948	0.11	0.0695033	0.54	7.92597e-07	5.99	4.83819e-07	12.8	6.45023e-07	6.3
U1301109	10-1-Ar-6	13.6703	±	0.0601216	1.37434	±	0.859	2.88643	±	0.504267	0.4276	94.5871	12.9429	±	0.176072	59.0103	±	0.823208		0.000923817	0.19	0.0694333	0.34	8.44089e-07	5	4.78019e-07	9.74	6.9846e-07	3.8
U1301111	10-1-Ar-6	13.3839	±	0.102952	1.52018	±	0.839464	1.49315	±	0.50627	0.386538	97.637	13.0816	±	0.194445	59.6324	±	0.902905		0.000643754	0.18	0.0698421	0.72	6.24178e-07	9.75	3.58193e-07	7.48	5.44292e-07	2.24
U1301112	10-1-Ar-6	13.4882	±	0.195507	0.810826	±	1.99581	0.408979	±	1.05522	0.725063	99.5982	13.4417	±	0.405338	61.2465	±	1.83181		0.000438047	0.08	0.0670599	1.44	5.00392e-07	4.99	3.13137e-07	16.8	4.88741e-07	5
U1301113	10-1-Ar-6	14.0835	±	0.0576274	1.91919	±	1.85079	1.59703	±	0.993683	0.306088	97.7694	13.7879	±	0.338659	62.7969	±	1.53585		0.000627736	0.16	0.0659987	0.33	7.59143e-07	5.44	4.58783e-07	15.7	5.78594e-07	6.04
U1301116	10-1-Ar-6	13.6597	±	0.0954096	1.99092	±	1.06221	2.81267	±	1.04528	0.295045	95.1136	13.0104	±	0.336738	59.3132	±	1.52812		0.000604208	0.2	0.0678436	0.63	6.48807e-07	3.36	4.60776e-07	7.28	6.28091e-07	5.88

## Sheet: Ar-Ar sample MK-54
Supplement B: Results of in situ argon isotopic analyses of sample MK-54 measured by UV laser ablation
J = 0.002569	40Ar/39Ar			37Ar/39Ar			36Ar/39Ar			K/Ca	40Ar*	40Ar*/39ArK			Age		1s		40Ar		39Ar/40Ar		38Ar		37Ar		36Ar
Analysis ID							(×10-3)				(%)				(Ma)		(Ma)		V	error in %		error in %	V	error in %	V	error in %	V	error in %
MK-54 cores
U1300701	13.7169	±	0.0558778	0.0835741	±	0.509298	2.09443	±	0.32236	11.9647	95.5381	13.1057	±	0.117802	59.7403	±	0.578129		0.001303	0.11	0.0701219	0.37	1.38393e-06	2.55	3.61166e-07	7.9	6.666e-07	3.1
U1300702	14.3146	±	0.070591	0.0897892	±	0.568024	0.174988	±	0.268984	11.1365	99.6903	14.2712	±	0.116593	64.9588	±	0.580382		0.00135734	0.12	0.0671801	0.46	1.21323e-06	3.32	4.13068e-07	11.85	5.64075e-07	1.95
U1300703	15.2706	±	0.0680509	0.19716	±	1.81231	1.73316	±	0.628063	5.07131	96.7523	14.7767	±	0.249105	67.2172	±	1.14318		0.000692506	0.25	0.0606164	0.24	7.0921e-07	5.35	3.86885e-07	21.5	6.2129e-07	2.36
U1300704	13.0664	±	0.07634	0.419398	±	1.08754	0.156293	±	0.568975	2.38367	99.9104	13.0585	±	0.206618	59.5289	±	0.955673		0.00088356	0.11	0.071853	0.56	9.65868e-07	8.72	4.73429e-07	16.1	6.07991e-07	4.9
U1300709	13.2017	±	0.0808943	1.00742	±	1.20042	1.21879	±	0.812661	0.991934	97.8992	12.9335	±	0.273905	58.9685	±	1.25036		0.000587036	0.38	0.0687741	0.23	6.83414e-07	4.62	4.77062e-07	10.7	6.68096e-07	4.36
U1300710	13.5635	±	0.0708128	0.202223	±	0.451123	1.42639	±	0.338987	4.94434	97.015	13.1605	±	0.127837	59.9863	±	0.619795		0.00126943	0.14	0.0708839	0.48	1.22874e-06	4.55	2.96531e-07	12.5	5.85973e-07	3.6
U1300711	13.9371	±	0.0763646	2.73368	±	1.28702	3.19609	±	0.857725	0.365104	94.836	13.2429	±	0.287035	60.3554	±	1.30827		0.000587116	0.25	0.0656867	0.4	6.67955e-07	3.28	4.54332e-07	10.99	6.10337e-07	4.67
U1300712	13.8813	±	0.0829156	0.0133354	±	1.14919	2.57029	±	0.999031	74.9875	94.5364	13.123	±	0.322296	59.818	±	1.46406		0.00051352	0.15	0.0650855	0.55	6.21746e-07	2.75	3.29875e-07	10.06	5.72684e-07	5.04
U1300717	16.6005	±	0.088325	1.2566	±	1.14625	12.5898	±	0.863986	0.795094	78.2116	12.995	±	0.282771	59.2442	±	1.28946		0.000736028	0.097	0.0561007	0.51	7.15696e-07	6.12	4.67907e-07	11.22	1.00154e-06	3.33
U1300801	20.0337	±	0.131544	3.03769	±	0.857105	23.0258	±	0.879651	0.328495	67.2831	13.5081	±	0.284499	61.5441	±	1.29712		0.00102581	0.18	0.0473682	0.6	9.47394e-07	4.91	4.32807e-07	9.01	1.54684e-06	2.53
U1300802	15.4057	±	0.0538363	1.19049	±	0.547644	9.20599	±	0.494516	0.839286	82.9771	12.7939	±	0.161047	58.3421	±	0.758259		0.00101303	0.15	0.061485	0.27	1.01525e-06	8.35	4.25001e-07	6.54	1.04767e-06	2.65
U1300803	13.966	±	0.0693456	1.55776	±	0.615198	4.24843	±	0.575281	0.641243	91.9279	12.8527	±	0.190334	58.6059	±	0.884541		0.000979744	0.19	0.0676871	0.41	9.74306e-07	4.59	4.58826e-07	8.29	7.53735e-07	4.76
U1300808	13.96	±	0.107885	0.170194	±	0.533177	0.828888	±	0.75123	5.87493	98.3457	13.7307	±	0.251748	62.5406	±	1.15353		0.000760226	0.22	0.0668256	0.7	7.9012e-07	3.62	4.03994e-07	4.63	6.00783e-07	5.82
U1300810	14.851	±	0.125039	0.299817	±	1.19231	4.66558	±	0.653995	3.33466	90.8825	13.4998	±	0.246171	61.5066	±	1.1289		0.000693067	0.12	0.0624059	0.82	7.16064e-07	7.1	3.39826e-07	13.66	6.5014e-07	3.3
U1300811	21.1698	±	0.102721	0.129975	±	0.783592	25.6739	±	1.07788	7.69309	64.2135	13.5951	±	0.333294	61.9335	±	1.51232		0.00147957	0.14	0.0456141	0.44	1.27139e-06	3.97	3.63848e-07	15.2	2.22825e-06	3.17
U1300901	16.7703	±	0.138129	0.143858	±	0.458411	11.1224	±	0.551048	6.95062	80.4724	13.4969	±	0.20173	61.4935	±	0.935422		0.00107646	0.23	0.0568004	0.75	1.02882e-06	4.14	4.22747e-08	8.58	1.20218e-06	1.14
U1300902	14.5166	±	0.103631	0.136953	±	0.486355	3.62269	±	0.410486	7.30107	92.7032	13.4586	±	0.160931	61.3223	±	0.760203		0.000983354	0.2	0.0653578	0.65	1.02151e-06	2.99	4.01334e-07	6.97	7.76493e-07	1.67
U1300905	14.4694	±	0.0646986	0.153277	±	0.653683	4.60908	±	0.670634	6.52345	90.6742	13.1214	±	0.215443	59.8109	±	0.994199		0.000882271	0.17	0.065229	0.37	8.63518e-07	6.16	3.77063e-07	8.55	8.02865e-07	3.44
MK-54 rims
U1300705	11.9902	±	0.0876337	0.211194	±	1.17779	0.585484	±	0.76658	4.73427	98.7019	11.8363	±	0.263082	54.04	±	1.20233		0.000524921	0.31	0.0748157	0.56	6.58581e-07	4.66	3.76337e-07	11.8	6.43591e-07	3.41
U1300706	8.6741	±	0.0478123	0.448172	±	2.87365	0.536202	±	1.89959	2.23058	98.5981	8.55519	±	0.615715	39.2211	±	2.79658		0.000214939	0.23	0.0863058	0.36	3.69231e-07	3.08	3.58735e-07	15.2	5.85836e-07	4.88
U1300707	12.6559	±	0.0613631	0.699363	±	1.43133	0.24866	±	0.472231	1.42917	99.8737	12.6462	±	0.193936	57.679	±	0.899675		0.00055953	0.19	0.071378	0.39	6.87824e-07	7.6	4.61781e-07	13.6	5.86409e-07	1.85
U1300708	9.70687	±	0.0464634	1.46009	±	1.81608	3.729	±	1.62794	0.684186	89.8846	8.73395	±	0.51015	40.0316	±	2.31791		0.000247874	0.24	0.0805433	0.26	3.69011e-07	7.52	4.63163e-07	7.18	6.93372e-07	4.14
U1300713	9.26932	±	0.0811981	2.04793	±	1.29833	4.10362	±	0.841316	0.487594	88.7342	8.23691	±	0.282523	37.7771	±	1.29096		0.000342853	0.25	0.0921002	0.78	5.36454e-07	6.85	4.38864e-07	8.7	6.12311e-07	3.47
U1300714	7.41978	±	0.031178	0.778283	±	0.695746	1.17623	±	0.721809	1.28418	96.1779	7.14009	±	0.224807	32.7922	±	1.03136		0.000405558	0.2	0.11803	0.28	7.70547e-07	5.31	4.06469e-07	6.32	5.38555e-07	5.72
U1300715	8.9093	±	0.0763867	1.14811	±	1.25514	4.98615	±	1.0275	0.870293	84.5215	7.53636	±	0.33001	34.5947	±	1.50668		0.000331817	0.26	0.0952697	0.75	8.06997e-07	2.02	4.05278e-07	8.91	6.40552e-07	4.43
U1300716	10.9307	±	0.0608992	0.413207	±	1.72355	5.08775	±	0.997729	2.41939	86.5566	9.464	±	0.333937	43.3378	±	1.52063		0.000372215	0.15	0.079009	0.5	4.97877e-07	5.88	4.21082e-07	13.46	6.28535e-07	4.21
U1300718	13.6516	±	0.047304	1.7871	±	0.951709	14.6161	±	0.581264	0.558862	69.4384	9.49137	±	0.193774	43.4617	±	0.893372		0.000558624	0.17	0.0666055	0.23	6.46935e-07	4.54	4.85062e-07	7.67	1.02559e-06	1.69
U1300804	8.9886	±	0.0488957	0.0901467	±	0.45448	5.37391	±	0.371879	11.0923	82.4157	7.40849	±	0.124613	34.0133	±	0.582559		0.000912646	0.3	0.104764	0.32	1.38033e-06	2.82	3.89215e-07	10.75	1.04185e-06	3.02
U1300805	9.37793	±	0.0581741	0.252495	±	1.25097	3.09695	±	1.24351	3.95977	90.4628	8.48505	±	0.388452	38.903	±	1.76866		0.000373399	0.22	0.0916017	0.51	5.54819e-07	8.06	3.89931e-07	10.46	6.30535e-07	6.23
U1300806	20.1594	±	0.21086	0.262837	±	1.1107	35.5259	±	1.17028	3.80393	48.0328	9.68494	±	0.365029	44.3372	±	1.65999		0.000714719	0.32	0.0460029	0.93	6.27594e-07	9.28	3.09198e-07	10.2	1.69955e-06	1.93
U1300807	11.9987	±	0.075328	0.219114	±	1.23368	2.62614	±	0.720306	4.56314	93.6825	11.2424	±	0.248164	51.3665	±	1.13608		0.000524377	0.25	0.0752367	0.5	6.23041e-07	2.6	4.38117e-07	11.5	6.62714e-07	3.58
U1300809	13.4558	±	0.122459	1.78504	±	1.24284	7.80911	±	0.711423	0.559509	83.9412	11.3092	±	0.256723	51.6673	±	1.17405		0.00064625	0.12	0.068455	0.89	7.24835e-07	6.7	5.4026e-07	10.8	9.06394e-07	3
U1300812	12.4178	±	0.0750699	0.460028	±	0.984989	7.43977	±	1.00189	2.17308	82.6005	10.2605	±	0.315732	46.9381	±	1.43773		0.000523164	0.16	0.0726911	0.55	7.34185e-07	4.22	4.01075e-07	8.79	7.66799e-07	4.42
U1300903	10.7078	±	0.10108	0.316547	±	1.27035	1.90506	±	1.34016	3.15839	94.9857	10.1732	±	0.424171	46.5438	±	1.92462		0.000348618	0.28	0.0799297	0.83	4.35018e-07	7.54	3.72162e-07	9.04	5.9529e-07	4.97
U1300904	12.6459	±	0.120389	0.184468	±	1.23144	4.38217	±	0.994577	5.42028	89.88	11.3676	±	0.331688	51.9307	±	1.50761		0.000585767	0.24	0.0723934	0.88	6.25034e-07	5.8	3.92558e-07	13.3	7.22756e-07	4.49
U1300906	10.2482	±	0.141169	0.274442	±	1.23825	3.84236	±	1.26986	3.64306	89.141	9.13712	±	0.411535	41.8582	±	1.87092		0.000379469	0.12	0.0848362	1.36	5.23819e-07	4.72	3.69207e-07	9.6	6.60112e-07	4.65

## Sheet: Ar-Ar sample 3i
Supplement C: Results of in situ argon isotopic analyses of sample 3i measured by UV laser ablation
		40Ar/39Ar			37Ar/39Ar			36Ar/39Ar			K/Ca	40Ar*	40Ar*/39ArK			Age		1s		40Ar		39Ar/40Ar		38Ar		37Ar		36Ar
Analysis ID	Ar disc							(×10-3)				(%)				(Ma)		(Ma)		V	error in %		error in %	V	error in %	V	error in %	V	error in %
3i - cores	J=0.002568
U1300501	3i-Ar-4p	29.2022	±	0.276304	0.0851264	±	0.28333	45.5858	±	2.17781	6.90972	53.8953	15.7396	±	0.663675	71.4842	±	2.96854		0.00128982	0.41	0.0287134	0.69	1.10512e-06	3.42	1.1688e-07	16.98	2.71057e-06	2.91
U1300502	3i-Ar-4p	22.3937	±	0.147228	0.106762	±	0.383369	15.8877	±	1.56622	5.50936	79.0743	17.7089	±	0.481527	80.2324	±	2.15678		0.00086995	0.32	0.0339915	0.37	7.96422e-07	6.7	1.22695e-07	10.2	1.56224e-06	2.79
U1300503	3i-Ar-4p	19.5907	±	0.0951515	0.0909198	±	0.381206	9.28474	±	1.18578	6.46941	86.0333	16.8556	±	0.361778	76.4468	±	1.63419		0.000889696	0.15	0.0391147	0.4	8.17463e-07	5.4	1.38902e-07	18	1.41558e-06	2.7
U1300509	3i-Ar-4p	21.2029	±	0.0513744	0.0156905	±	0.0908449	14.7335	±	0.551942	37.4895	79.4724	16.8506	±	0.168434	76.4248	±	0.805631		0.00310434	0.079	0.043483	0.21	2.49057e-06	2.42	1.91877e-07	12	3.15401e-06	2.04
U1300510	3i-Ar-4p	18.5409	±	0.0550495	0.0731437	±	0.068733	6.49131	±	0.361094	8.04178	89.6867	16.6296	±	0.118027	75.4431	±	0.60196		0.00354271	0.1128	0.0501431	0.2466	2.71806e-06	2.9505	1.77807e-07	12.9428	2.27969e-06	1.6488
U1301004	3i-Ar-4	16.7241	±	0.0808268	0.126236	±	0.59416	0.614491	±	0.459862	4.65941	98.9763	16.5544	±	0.165269	75.1088	±	0.791206		0.00123901	0.12	0.0572148	0.45	1.03349e-06	5.17	3.50869e-07	11.28	6.10574e-07	4.02
U1301005	3i-Ar-4	16.1474	±	0.193942	0.89649	±	0.806141	0.667039	±	0.663505	0.65574	99.2357	16.0341	±	0.283025	72.7953	±	1.29129		0.000772023	0.1	0.0576642	1.19	7.40155e-07	5.49	4.27603e-07	7.23	5.96582e-07	3.4
U1301006	3i-Ar-4	17.5034	±	0.0486314	0.936791	±	0.566766	2.94155	±	0.60344	0.627512	95.4739	16.7222	±	0.190505	75.8543	±	0.89689		0.00112952	0.16	0.054436	0.15	9.78803e-07	4.32	4.47337e-07	6.57	7.48942e-07	4.04
U1301010	3i-Ar-4	17.1652	±	0.160981	1.67183	±	0.777237	2.28505	±	0.945494	0.351437	96.867	16.647	±	0.326892	75.5204	±	1.48219		0.000781618	0.15	0.0547701	0.91	6.88454e-07	5.8	4.78579e-07	3.89	6.27133e-07	5.82
U1301011	3i-Ar-4	17.4883	±	0.109237	2.4096	±	1.40832	3.43519	±	0.854509	0.243707	95.3282	16.6995	±	0.29784	75.7538	±	1.35598		0.00079271	0.2	0.0538074	0.55	6.81784e-07	2.75	5.11326e-07	10.9	6.76204e-07	4.73
U1301012	3i-Ar-4	17.4619	±	0.134262	1.744	±	0.879663	0.523776	±	0.428593	0.336877	99.9347	17.4719	±	0.198816	79.1819	±	0.934412		0.000919546	0.14	0.054349	0.74	7.11344e-07	7.2	4.94895e-07	7.16	5.54949e-07	2.25
U1301013	3i-Ar-4	17.9785	±	0.158643	0.221753	±	0.781566	4.63263	±	0.720497	2.65225	92.487	16.6303	±	0.266554	75.4464	±	1.22065		0.000819162	0.13	0.0524473	0.86	7.14946e-07	5.54	3.46516e-07	5.52	7.29112e-07	3.5
U1301014	3i-Ar-4	16.8624	±	0.148695	0.192988	±	0.980739	0.318832	±	0.589638	3.04763	99.5354	16.7863	±	0.242763	76.1393	±	1.11869		0.000879247	0.22	0.0561938	0.82	6.70627e-07	9.1	3.41537e-07	12.06	5.39787e-07	4.84
3i - rims	J=0.002568
U1301001	3i-Ar-4	14.4838	±	0.0828896	0.255164	±	1.15222	3.75828	±	1.05467	2.30491	92.4771	13.3966	±	0.335303	61.0211	±	1.52081		0.000552594	0.29	0.0633599	0.37	5.48822e-07	7.8	3.7312e-07	8.45	5.80471e-07	4.55
U1301002	3i-Ar-4	14.1041	±	0.0887509	0.174259	±	1.02381	1.42788	±	0.67215	3.37522	97.11	13.6982	±	0.232702	62.3713	±	1.06992		0.000772651	0.25	0.0663848	0.51	7.05921e-07	10.4	3.81545e-07	13.8	5.73073e-07	5.39
U1301003	3i-Ar-4	16.0158	±	0.0679027	0.196919	±	0.903591	7.04817	±	0.873656	2.98678	87.0968	13.9511	±	0.275293	63.5029	±	1.25633		0.00077648	0.11	0.0584931	0.39	7.27746e-07	4.9	3.5966e-07	10.5	8.21799e-07	4.45
U1301007	3i-Ar-4	15.5059	±	0.135692	1.69362	±	2.55739	3.77243	±	1.80309	0.346911	93.7087	14.5477	±	0.588174	66.1692	±	2.63962		0.000379	0.24	0.0572117	0.79	3.72531e-07	9.09	3.86298e-07	12.5	5.54223e-07	6.2
U1301008	3i-Ar-4	13.834	±	0.0554563	1.15698	±	1.58891	2.44791	±	1.183	0.508011	95.4587	13.2165	±	0.37763	60.2141	±	1.70858		0.000452425	0.2	0.0650917	0.26	4.92748e-07	5.8	4.02131e-07	10.9	5.79601e-07	5.23
U1301009	3i-Ar-4	14.189	±	0.157957	1.19361	±	1.4342	3.87605	±	0.6792	0.492408	92.6193	13.1528	±	0.276074	59.9289	±	1.25949		0.000464014	0.35	0.0636397	0.98	4.79745e-07	5.58	4.0335e-07	9.54	6.22284e-07	1.67
U1301015	3i-Ar-4	14.6656	±	0.101907	0.257747	±	1.66902	3.38775	±	0.960755	2.2818	93.3184	13.6882	±	0.329874	62.3264	±	1.49656		0.0005898	0.16	0.0628627	0.65	6.54694e-07	5.3	3.85956e-07	14.9	6.50449e-07	5.1
U1301016	3i-Ar-4	14.7558	±	0.0650099	0.271058	±	1.35584	1.72107	±	0.861329	2.16974	96.7044	14.2723	±	0.285381	64.9386	±	1.30066		0.000566581	0.2	0.0622643	0.32	5.56038e-07	6.1	3.75705e-07	10.7	5.85073e-07	4.7
3i - cores	J=0.002567
U1300602	3i-Ar-6	18.5734	±	0.211466	0.290516	±	1.02552	15.0091	±	1.31409	2.02438	76.2494	14.165	±	0.427428	64.4345	±	1.9267		0.000538003	0.23	0.048157	1.08	4.70549e-07	5.7	3.25568e-07	6.5	8.86419e-07	3.3
U1300603	3i-Ar-6	18.2674	±	0.105104	0.210044	±	1.10582	9.97407	±	0.974077	2.80012	83.9601	15.3396	±	0.315817	69.6755	±	1.43347		0.000711547	0.27	0.0503636	0.41	7.04447e-07	5.1	4.00212e-07	11.1	8.55017e-07	3.57
U1300605	3i-Ar-6	21.7969	±	0.108974	0.162492	±	0.711416	18.2525	±	0.603252	3.61967	75.3164	16.4185	±	0.204908	74.4766	±	0.956191		0.00107224	0.16	0.0432694	0.44	8.97311e-07	3.05	3.49474e-07	10.7	1.40523e-06	1.62
U1300607	3i-Ar-6	19.5442	±	0.0837223	0.20883	±	1.24343	9.8978	±	1.60042	2.8164	85.1228	16.639	±	0.48967	75.4561	±	2.1948		0.000768987	0.18	0.0475578	0.33	6.4639e-07	4.8	3.5561e-07	13	8.95525e-07	3.3
U1300609	3i-Ar-6	22.0858	±	0.0578467	0.535481	±	1.00606	17.8108	±	1.20136	1.0981	76.3692	16.8731	±	0.368071	76.4957	±	1.66104		0.00105808	0.15	0.0427687	0.14	8.54299e-07	4.87	3.96965e-07	11.9	1.34414e-06	3.46
U1300611	3i-Ar-6	17.3394	±	0.130042	0.178379	±	1.11049	3.45116	±	0.654201	3.29725	94.2031	16.3363	±	0.247509	74.1114	±	1.13779		0.000808447	0.32	0.0531227	0.58	6.71768e-07	3.26	4.08938e-07	9.3	7.341e-07	3.18
U1300613	3i-Ar-6	18.2609	±	0.116521	0.208691	±	1.12262	3.902	±	0.757975	2.81828	93.7797	17.1275	±	0.266387	77.6244	±	1.22016		0.000733376	0.19	0.0501629	0.57	6.34524e-07	5.1	4.00928e-07	6.03	7.48527e-07	2.92
U1300615	3i-Ar-6	20.931	±	0.140762	0.131995	±	0.915038	13.9364	±	0.394827	4.45607	80.3767	16.8252	±	0.178352	76.2829	±	0.846259		0.00128004	0.14	0.0454728	0.64	9.56592e-07	3.25	4.66962e-07	10.7	1.42148e-06	1
U1300616	3i-Ar-6	18.5306	±	0.0910335	0.419305	±	1.14039	9.08464	±	0.99398	1.40247	85.6991	15.8852	±	0.319154	72.1053	±	1.44799		0.000831229	0.24	0.0505195	0.34	7.13211e-07	6.57	3.77e-07	12.46	8.85139e-07	3.28
U1300617	3i-Ar-6	17.0465	±	0.0843591	1.37333	±	0.631527	4.10325	±	0.738878	0.427914	93.5494	15.9623	±	0.238357	72.4482	±	1.09778		0.00106554	0.14	0.0556345	0.45	8.11043e-07	5.36	4.41451e-07	9.32	7.85194e-07	4.78
U1300619	3i-Ar-6	18.7214	±	0.211608	2.80776	±	1.0035	2.74792	±	1.15206	0.20909	96.8956	18.1761	±	0.407075	82.2699	±	1.82966		0.000790827	0.17	0.0495336	1.1	6.72439e-07	4.1	4.96387e-07	9.2	7.05827e-07	5.6
U1300622	3i-Ar-6	18.1399	±	0.116046	1.11575	±	0.612791	1.50727	±	0.766166	0.526797	98.0503	17.8001	±	0.258747	80.6058	±	1.18851		0.00114838	0.15	0.0523253	0.6	9.57749e-07	4.7	5.12749e-07	7.9	7.24601e-07	5.58
U1300624	3i-Ar-6	21.5743	±	0.129008	0.215386	±	0.920193	14.6483	±	1.04866	2.73067	80.0185	17.266	±	0.336239	78.2388	±	1.52219		0.000842662	0.23	0.0431644	0.49	7.70208e-07	3.97	4.07253e-07	8.68	1.16997e-06	2.65
3i - rims	J=0.002567
U1300601	3i-Ar-6	23.1652	±	0.313587	0.46077	±	2.9135	27.921	±	1.89873	1.27622	64.5469	14.9572	±	0.640392	67.9713	±	2.86848		0.000431494	0.4	0.037841	1.2	4.02733e-07	9.28	3.41938e-07	12.5	9.20782e-07	2.46
U1300604	3i-Ar-6	15.8828	±	0.131737	0.306406	±	1.58841	8.0375	±	1.01376	1.91938	85.2048	13.5358	±	0.345781	61.6208	±	1.56642		0.000452082	0.15	0.0544571	0.79	4.59311e-07	8.7	3.63835e-07	12.8	7.51232e-07	2.56
U1300606	3i-Ar-6	15.9606	±	0.0364435	0.154069	±	0.585115	9.35541	±	0.685703	3.81758	82.7585	13.2102	±	0.210663	60.1629	±	0.972827		0.000842606	0.09	0.0580954	0.18	8.70909e-07	6.7	3.66183e-07	8.3	1.01352e-06	2.92
U1300608	3i-Ar-6	16.2766	±	0.11033	0.429968	±	1.19794	6.56243	±	0.602427	1.36768	88.3031	14.3771	±	0.225954	65.3819	±	1.04134		0.000964135	0.15	0.0576803	0.64	8.95327e-07	6.2	3.96569e-07	20	8.9978e-07	2.02
U1300610	3i-Ar-6	14.5349	±	0.182674	1.15605	±	1.83951	7.38575	±	1.3212	0.508418	85.6384	12.4576	±	0.447342	56.7888	±	2.01989		0.000416972	0.23	0.0582899	1.2	4.58218e-07	6.8	4.88055e-07	6.4	7.65473e-07	3.65
U1300612	3i-Ar-6	14.4866	±	0.093232	0.276802	±	1.66363	6.46118	±	1.42679	2.1247	86.9775	12.6026	±	0.451112	57.4392	±	2.03626		0.000465146	0.2	0.0595709	0.56	4.69211e-07	4.04	4.16898e-07	8.25	7.65037e-07	4.74
U1300614	3i-Ar-6	14.2492	±	0.114729	0.212493	±	1.2237	4.8873	±	1.05106	2.76785	89.9873	12.8244	±	0.342625	58.4341	±	1.55327		0.000576899	0.15	0.0626642	0.77	6.83938e-07	3.89	3.77799e-07	8.4	7.81895e-07	4.32
U1300618	3i-Ar-6	15.021	±	0.139227	0.212913	±	0.633685	5.57052	±	0.913825	2.76238	89.1579	13.3944	±	0.302133	60.9879	±	1.37379		0.000605233	0.26	0.0605382	0.84	6.03983e-07	4.58	3.02944e-07	5.39	7.45622e-07	3.31
U1300620	3i-Ar-6	15.6273	±	0.0923804	2.48278	±	1.208	2.46061	±	0.749763	0.236513	96.6533	15.1307	±	0.259757	68.7446	±	1.18899		0.000643395	0.27	0.0582631	0.43	6.5318e-07	7.94	4.74647e-07	11.37	6.90303e-07	2.59
U1300621	3i-Ar-6	14.4245	±	0.0629111	0.541036	±	0.845978	5.1896	±	0.512293	1.08683	89.677	12.9404	±	0.176147	58.9541	±	0.822902		0.00103132	0.099	0.065431	0.41	9.77617e-07	5.63	4.0228e-07	17.4	9.5038e-07	2.83
U1300623	3i-Ar-6	16.2164	±	0.109054	0.466175	±	0.90041	4.0481	±	0.944119	1.26142	92.8598	15.0634	±	0.306688	68.4449	±	1.39356		0.000610031	0.29	0.0557852	0.51	6.60311e-07	5.22	4.4728e-07	6.91	7.72059e-07	3.03

## Sheet: Ar-Ar sample MK-99
Supplement D: Results of in situ argon isotopic analyses of sample MK-99 measured by UV laser ablation
		40Ar/39Ar			37Ar/39Ar			36Ar/39Ar			K/Ca	40Ar*	40Ar*/39ArK			Age		1s		40Ar		39Ar/40Ar		38Ar		37Ar		36Ar
Analysis ID	Ar disc							(×10-3)				(%)				(Ma)		(Ma)		V	error in %		error in %	V	error in %	V	error in %	V	error in %
MK-99	J=0.001674
U0703101	MK-99-DS	36.2888	±	0.24672	4.38907e-34	±	1.81764e-33	16.0371	±	0.933866	> 1000	86.9409	31.5498	±	0.34894	92.8503	±	1.06617		0.00120757	0.1176	0.0262307	0.6136	7.85835e-07	5.7984	2.4687e-08	99.99	9.09196e-07	2.4245
U0703102	MK-99-DS	35.9728	±	0.299939	9.63724e-35	±	2.12935e-33	22.2011	±	1.52922	> 1000	81.7628	29.4123	±	0.513443	86.7084	±	1.51724		0.000784761	0.1812	0.0252969	0.7116	6.55097e-07	14.7993	1.36269e-08	99.99	8.41682e-07	2.718
U0703103	MK-99-DS	30.9013	±	0.142928	6.93987e-34	±	8.01207e-34	10.7351	±	0.286784	> 1000	89.7344	27.7291	±	0.153679	81.8571	±	0.549678		0.00369908	0.0964	0.0325478	0.4262	2.49694e-06	2.9132	9.27577e-08	13.1707	1.57998e-06	1.7982
U0703106	MK-99-DS	34.5423	±	0.159441	2.0123e-32	±	1.97988e-33	14.7003	±	0.684319	> 1000	87.4243	30.1984	±	0.245928	88.9696	±	0.789854		0.00260965	0.1284	0.0288334	0.405	1.51626e-06	3.6452	8.34582e-07	7.1882	1.3953e-06	3.3542
U0703107	MK-99-DS	33.7079	±	0.134132	5.16106e-33	±	1.02255e-33	10.7818	±	0.562057	> 1000	90.5482	30.5219	±	0.206092	89.8993	±	0.690829		0.00296092	0.1125	0.0296646	0.3485	1.6677e-06	5.3011	2.89745e-07	8.4454	1.3357e-06	2.4637
U0703108	MK-99-DS	32.2144	±	0.215286	8.50132e-35	±	3.78871e-33	13.0048	±	2.0017	> 1000	88.0708	28.3715	±	0.621873	83.7101	±	1.82338		0.000798848	0.21	0.0285505	0.5361	4.59423e-07	11.4183	2.04989e-08	99.99	6.91745e-07	3.9473
U0703109	MK-99-DS	37.8288	±	0.64821	1.63615e-33	±	1.37134e-32	13.1384	±	6.6611	> 1000	89.7369	33.9464	±	2.05179	99.7119	±	5.87646		0.000427204	0.1091	0.0218287	1.5763	3.01933e-07	13.3976	6.26759e-08	83.1919	5.19436e-07	9.3341
U0703110	MK-99-DS	47.1732	±	1.60183	2.04532e-31	±	1.50757e-32	57.1668	±	11.7758	> 1000	64.1899	30.2804	±	3.79036	89.2054	±	10.9004		0.000486728	0.2137	0.0168642	1.0305	3.1998e-07	29.4677	8.8e-07	6.8021	7.21403e-07	6.8992
MK-99	J=0.001687
U0702301	MK-99-f	32.9645	±	0.147786	0.354618	±	0.0264057	17.7858	±	0.860936	1.65821	84.196	27.7644	±	0.282695	82.581	±	0.8838		0.0027117	0.0641	0.0281794	0.4359	1.75183e-06	6.3778	9.69712e-07	6.5529	2.1219e-06	2.0773
U0702302	MK-99-f	37.6208	±	0.531095	0.563503	±	0.0886918	34.2324	±	2.45865	1.04332	73.3059	27.5934	±	0.814865	82.084	±	2.39164		0.00142736	0.1908	0.0229095	1.3749	1.0215e-06	9.5812	6.6842e-07	14.3454	1.87849e-06	3.3063
U0702303	MK-99-f	33.5701	±	0.111202	7.36385e-33	±	2.41657e-33	13.7154	±	1.26163	> 1000	87.927	29.5172	±	0.385439	87.6697	±	1.16934		0.00126426	0.0725	0.0286247	0.2868	8.09054e-07	4.2123	1.71034e-07	22.128	8.46742e-07	4.2173
U0702304	MK-99-f	33.1112	±	0.158753	5.75767e-33	±	2.77156e-33	14.2345	±	1.16718	> 1000	87.2964	28.9049	±	0.371625	85.8939	±	1.13009		0.00158732	0.1028	0.0294417	0.4339	1.01334e-06	10.656	1.72437e-07	36.6216	1.01382e-06	4.5281
U0702305	MK-99-f	36.1074	±	0.488671	2.99109e-33	±	1.03669e-32	23.9307	±	4.57271	> 1000	80.4153	29.0359	±	1.40731	86.2739	±	4.09717		0.000522582	0.3464	0.0234746	1.168	3.57417e-07	15.7528	8.55325e-08	59.3031	6.79863e-07	7.0057
U0702306	MK-99-f	33.9629	±	0.269425	2.31805e-33	±	1.96325e-33	13.3061	±	0.88448	> 1000	88.4228	30.0309	±	0.355052	89.1585	±	1.08649		0.00175724	0.2563	0.0287185	0.6739	1.07392e-06	5.626	1.28042e-07	22.0824	1.05422e-06	3.2609
U0702307	MK-99-f	41.2796	±	0.478071	3.61843e-34	±	2.44432e-32	12.2938	±	8.20061	0.000303446	92.939	37.6467	±	2.46273	111.086	±	7.06101		0.000316838	0.2491	0.0176843	0.868	2.00996e-07	36.0838	6.71957e-08	84.8032	4.57846e-07	7.8679
U0702308	MK-99-f	32.3359	±	0.0899358	7.8297e-33	±	1.72718e-33	14.1662	±	1.15671	> 1000	87.0543	28.1498	±	0.351004	83.7012	±	1.07168		0.00175168	0.1107	0.0301272	0.2008	1.27875e-06	5.2382	2.28058e-07	20.6587	1.06683e-06	4.6037
U0702309	MK-99-f	33.7935	±	0.0984316	6.72452e-33	±	6.94375e-34	15.1718	±	0.517784	> 1000	86.7334	29.3103	±	0.17497	87.0698	±	0.612046		0.00409393	0.0516	0.0297647	0.2707	2.64677e-06	2.9292	4.42488e-07	9.8438	2.15657e-06	2.3799
U0702310	MK-99-f	37.0869	±	0.117252	2.41338e-32	±	1.24721e-33	22.95	±	0.552542	> 1000	81.714	30.3052	±	0.191192	89.9529	±	0.656706		0.00455594	0.1495	0.0271877	0.2203	2.98249e-06	3.0123	1.58724e-06	5.0908	3.13976e-06	1.8199
U0702311	MK-99-f	33.8762	±	0.174395	1.16026e-33	±	8.03916e-34	13.9729	±	0.463659	> 1000	87.8115	29.7472	±	0.205168	88.3366	±	0.688476		0.00368397	0.1035	0.0296357	0.4751	2.18823e-06	3.3749	8.41777e-08	50.9365	1.91657e-06	2.3533
